# Supplementary material
Source: PubMed Central journal article supplement (PMC5378110)
Supplement: 1517TableS1.pdf [file 1517TableS1.pdf]

**Table S1. Primers**

| Gland         | Paralog | Primer efficiency, R <sup>2</sup> |     | Primer Sequence (5'-3')          |
|---------------|---------|-----------------------------------|-----|----------------------------------|
| Lacrimal      | a2      | 0.99, 0.99                        | FWD | CAGAAGAGTATGTTAATTATGTGGAG       |
|               |         |                                   | REV | AAAGATGTAGCCATCAACATAACGG        |
| Lacrimal      | bg2     | 1.13, 0.99                        | FWD | TTTGGGTATTCTCTCTGGAAACA          |
|               |         |                                   | REV | AGAATGTTCTTCAAGACTTCTTTG         |
| Lacrimal      | a3      | 1.03, 0.97                        | FWD | CTGCAAAAATCAAGCAATGTG            |
|               |         |                                   | REV | TAGCGGGCTGGCTTCTATT              |
| Lacrimal      | bg3     | 1.03, 0.98                        | FWD | TTGAGCACTGTCTCTGGGAAAA           |
|               |         |                                   | REV | CATCCATTTCTTGGTAATCACAC          |
| Lacrimal      | bg7     | 0.90, 0.92                        | FWD | GCATGTTTTCTTTCTTTGAAGC           |
|               |         |                                   | REV | CCATAGTATGACAGGCATTCAGG          |
| Lacrimal      | bg12    | 0.83, 0.99                        | FWD | ACTCTTCACCATGAAGGGGAT            |
|               |         |                                   | REV | GAAATAAAGTCTAAAATGGATCTAAAATTGTC |
| Lacrimal      | bg20    | 1.61, 0.95                        | FWD | TGTCTTCCTTTCTTCGAAGGC            |
|               |         |                                   | REV | CCATAGTATGACAGGCATTCAGG          |
| Lacrimal      | a24     | 1.02, 0.97                        | FWD | GATGTTTCATCTATTCTTTCACAGG        |
|               |         |                                   | REV | AAGATGCAAACATCAACATGCTGGT        |
| Lacrimal      | bg24    | 1.29, 0.99                        | FWD | GCTGGTGTTATCTCAGGAAGCA           |
|               |         |                                   | REV | CGTAAAGGTTTCTTCGGAATAGT          |
| Submandibular | bg26    | 1.05, 0.99                        | FWD | CGGAGCAATACTTACTCTAAGG           |
|               |         |                                   | REV | CTTTAAGAGGTCATTGCCATAGT          |
| Submandibular | a27     | 0.88, 0.99                        | FWD | ACAGAGAAAAGTTGATTTATTTTTGAATG    |
|               |         |                                   | REV | GGAGGCAATTGGTTTCCG               |
| Submandibular | bg27    | 1.11, 0.99                        | FWD | TAAAATACTGGGTGGAATAGGC           |
|               |         |                                   | REV | CCGCCATTTTGTTACAGAATCT           |
