# Supplementary material
Source: PubMed Central journal article supplement (PMC5378110)
Supplement: 1517TableS3.pdf [file 1517TableS3.pdf]

**Table S3.** Progenitor results for six two-way comparisons of A27, BG27 and BG26 values determined with Top3 quantitation and statistically evaluated with an ANOVA

Female +/+ vs +/-

| Peptides | Score   | Anova (p)* | Fold | Description   | Average Normalised Abundances |           |
|----------|---------|------------|------|---------------|-------------------------------|-----------|
|          |         |            |      |               | Female++                      | Female+-  |
| 16 (16)  | 1153.57 | 0.04       | 2.22 | bg27 secreted | 1.70e+006                     | 7.67e+005 |
| 13 (13)  | 795.92  | 0.28       | 1.26 | bg26 secreted | 4.15e+005                     | 5.22e+005 |
| 9 (9)    | 579.15  | 0.19       | 1.44 | a27 secreted  | 2.42e+006                     | 1.68e+006 |

Female +/- vs -/-

| Peptides | Score   | Anova (p)* | Fold   | Description   | Average Normalised Abundances |           |
|----------|---------|------------|--------|---------------|-------------------------------|-----------|
|          |         |            |        |               | Female+-                      | Female--  |
| 16 (16)  | 1153.57 | 4.17e-007  | 308.54 | bg27 secreted | 7.67e+005                     | 2485.02   |
| 13 (13)  | 795.92  | 1.95e-003  | 12.35  | bg26 secreted | 5.22e+005                     | 4.23e+004 |
| 9 (9)    | 579.15  | 4.08e-005  | 57.25  | a27 secreted  | 1.68e+006                     | 2.93e+004 |

Female +/+ vs -/-

| Peptides | Score   | Anova (p)* | Fold   | Description   | Average Normalised Abundances |           |
|----------|---------|------------|--------|---------------|-------------------------------|-----------|
|          |         |            |        |               | Female++                      | Female--  |
| 16 (16)  | 1153.57 | 1.26e-005  | 685.74 | bg27 secreted | 1.70e+006                     | 2485.02   |
| 13 (13)  | 795.92  | 4.85e-003  | 9.80   | bg26 secreted | 4.15e+005                     | 4.23e+004 |
| 9 (9)    | 579.15  | 8.44e-005  | 82.53  | a27 secreted  | 2.42e+006                     | 2.93e+004 |

Male +/+ vs +/-

| Peptides | Score   | Anova (p)* | Fold | Description   | Average Normalised Abundances |           |
|----------|---------|------------|------|---------------|-------------------------------|-----------|
|          |         |            |      |               | Male++                        | Male+-    |
| 16 (16)  | 1153.57 | 0.24       | 1.56 | bg27 secreted | 1.22e+006                     | 7.85e+005 |
| 13 (13)  | 795.92  | 6.43e-003  | 2.14 | bg26 secreted | 1.91e+005                     | 4.10e+005 |
| 9 (9)    | 579.15  | 0.28       | 1.37 | a27 secreted  | 1.49e+006                     | 1.09e+006 |

Male +/- vs -/-

| Peptides | Score   | Anova (p)* | Fold   | Description   | Average Normalised Abundances |           |
|----------|---------|------------|--------|---------------|-------------------------------|-----------|
|          |         |            |        |               | Male+-                        | Male--    |
| 16 (16)  | 1153.57 | 1.74e-003  | 106.42 | bg27 secreted | 7.85e+005                     | 7374.42   |
| 13 (13)  | 795.92  | 6.25e-003  | 10.55  | bg26 secreted | 4.10e+005                     | 3.89e+004 |
| 9 (9)    | 579.15  | 6.52e-006  | 47.92  | a27 secreted  | 1.09e+006                     | 2.27e+004 |

Male +/+ vs -/-

| Peptides | Score   | Anova (p)* | Fold   | Description   | Average Normalised Abundances |           |
|----------|---------|------------|--------|---------------|-------------------------------|-----------|
|          |         |            |        |               | Male++                        | Male--    |
| 16 (16)  | 1153.57 | 1.60e-003  | 165.60 | bg27 secreted | 1.22e+006                     | 7374.42   |
| 13 (13)  | 795.92  | 0.02       | 4.93   | bg26 secreted | 1.91e+005                     | 3.89e+004 |
| 9 (9)    | 579.15  | 7.40e-005  | 65.60  | a27 secreted  | 1.49e+006                     | 2.27e+004 |
