# Supplementary material
Source: PubMed Central journal article supplement (PMC5378110)
Supplement: 1517TableS4.pdf [file 1517TableS4.pdf]

**Table S4.** Weight Gain Slopes between Mouse Knockout Genotypes by Gender

## A. Means and Standard Deviation of Slope by Genotype and Gender

|               | <b>Genotype</b> | <b>n</b> | <b>Mean</b> | <b>(S.D.)</b> |
|---------------|-----------------|----------|-------------|---------------|
| <b>Male</b>   | WT              | 6        | 0.478       | (0.030)       |
|               | Het             | 9        | 0.483       | (0.024)       |
|               | KO              | 3        | 0.412       | (0.042)       |
| <b>Female</b> | WT              | 5        | 0.294       | (0.016)       |
|               | Het             | 3        | 0.363       | (0.021)       |
|               | KO              | 3        | 0.285       | (0.020)       |

## B. Statistical Significance of Difference in Slope between Genotype by Gender

|               | <b>p-value</b>    |                   |                   |
|---------------|-------------------|-------------------|-------------------|
|               | <b>+/+ vs +/-</b> | <b>+/+ vs -/-</b> | <b>+/- vs -/-</b> |
| <b>Male</b>   | 0.4426            | 0.4426            | 0.3489            |
| <b>Female</b> | 0.0714            | 0.9488            | 0.0714            |
